# Supplementary material
Source: PubMed Central journal article supplement (PMC8518534)

## **Supplementary Information: Alzheimer's disease alters oligodendrocytic glycolytic and ketolytic gene expression**

Erin R. Saito<sup>1,+</sup>, Justin B. Miller<sup>2,+</sup>, Oscar Harari<sup>3</sup>, Carlos Cruchaga<sup>3,4,5,6</sup>, Kathie A. Mihindikulasuriya<sup>7</sup>, John S. K. Kauwe<sup>2</sup>, Benjamin T. Bikman<sup>1,\*</sup>

<sup>1</sup>Department of Physiology & Developmental Biology, Brigham Young University, Provo, UT 84602, USA

<sup>2</sup>Department of Biology, Brigham Young University, Provo, UT 84602, USA

<sup>3</sup>Department of Psychiatry, Washington University School of Medicine, 660 S. Euclid Ave. CB8134, St. Louis, MO 63110, USA

<sup>4</sup>Department of Neurology, Washington University School of Medicine, St Louis, MO 63108, USA

<sup>5</sup>Hope Center for Neurological Disorders. Washington University School of Medicine, St. Louis, MO 63110, USA

<sup>6</sup>NeuroGenomics and Informatics, Washington University School of Medicine, St. Louis, MO 63110, USA

<sup>7</sup>The Edison Family Center for Genome Sciences & Systems Biology, Pathology & Immunology, Washington University School of Medicine, St. Louis MO 63108, USA

+The first two authors wish it to be known that, in their opinion, they contributed equally to this work

\*To whom correspondence should be sent:

Benjamin Bikman, Ph.D.  
3017 LSB  
Brigham Young University  
Provo, UT 84602  
(801) 422-1798  
bikman@byu.edu

## **Table of Contents**

|                                                                                                                 |    |
|-----------------------------------------------------------------------------------------------------------------|----|
| Tables .....                                                                                                    | 3  |
| Table S1. Cell-specific gene markers for neurons, astrocytes, oligodendrocytes, microglia.....                  | 3  |
| Table S2. Clinical Dementia Rating (CDR) and Braak neurofibrillary tangle stage of AD cases and controls .....  | 4  |
| Table S3. Number of genes removed by filters.....                                                               | 5  |
| Table S4. Number of AD cases and controls with genes that passed filtering criteria for each brain region ..... | 6  |
| Table S5. Bonferroni corrected $\alpha$ -values by brain region and cell type for glycolytic genes .....        | 7  |
| Table S6. Bonferroni corrected $\alpha$ -values by brain region and cell type for ketolytic genes.....          | 8  |
| Table S7. Empirical p-values by brain region and cell type.....                                                 | 9  |
| Table S8. Glycolytic genes in neurons included from each dataset.....                                           | 10 |
| Table S9. Glycolytic genes in astrocytes included from each dataset .....                                       | 11 |
| Table S10. Glycolytic genes in oligodendrocytes included from each dataset .....                                | 12 |
| Table S11. Glycolytic genes in microglia included from each dataset .....                                       | 13 |
| Table S12. Ketolytic genes in neurons included from each dataset .....                                          | 14 |
| Table S13. Ketolytic genes in astrocytes included from each dataset.....                                        | 15 |
| Table S14. Ketolytic genes in oligodendrocytes included from each dataset .....                                 | 16 |
| Table S15. Ketolytic genes in microglia included from each dataset.....                                         | 17 |
| Figures.....                                                                                                    | 18 |
| Figure S1: Glycolysis in Astrocytes .....                                                                       | 18 |
| Figure S2: Glycolysis in Microglia .....                                                                        | 19 |
| Figure S3: Ketolysis in Astrocytes.....                                                                         | 20 |
| Figure S4: Ketolysis in Microglia .....                                                                         | 21 |

## Tables

**Table S1. Cell-specific gene markers for neurons, astrocytes, oligodendrocytes, microglia**

| <b>Cell Type</b> | <b>Cell Markers</b> |
|------------------|---------------------|
| Neuron           | <i>STMN2</i>        |
|                  | <i>SYN1</i>         |
|                  | <i>SYT1</i>         |
|                  | <i>GAD1</i>         |
|                  | <i>CCK</i>          |
| Astrocyte        | <i>GFAP</i>         |
|                  | <i>ALDH1L1</i>      |
|                  | <i>AQP4</i>         |
|                  | <i>GJA1</i>         |
|                  | <i>SOX9</i>         |
| Oligodendrocyte  | <i>MOG</i>          |
|                  | <i>MOBP</i>         |
|                  | <i>SOX10</i>        |
|                  | <i>GPR37</i>        |
| Microglia        | <i>TLR2</i>         |
|                  | <i>CX3CR1</i>       |
|                  | <i>IL1A</i>         |

**Table S2. Clinical Dementia Rating (CDR) and Braak neurofibrillary tangle stage of AD cases and controls**

AD cases were comprised of individuals with definitive diagnoses of AD. AD: Alzheimer's Disease (definite diagnosis according to the NINCDS-ADRDA criteria and had Braak NFT stage of IV or greater)

Control: Braak NFT stage of III or less, CERAD neuritic and cortical plaque densities of 0 (none) or 1 (sparse) AND lacked any of the following pathologic diagnoses: AD, Parkinson's disease (PD), DLB, VaD, PSP, motor neuron disease (MND), CBD, Pick's disease (PiD), Huntington's disease (HD), FTLN, hippocampal sclerosis (HipScl) or dementia lacking distinctive histology (DLNH)

|             | Knight-ADRC |         | Mayo Clinic Brain Bank |         | Mount Sinai Brain Bank |         |
|-------------|-------------|---------|------------------------|---------|------------------------|---------|
|             | AD          | Control | AD                     | Control | AD                     | Control |
| Sample Size | 86          | 15      | 82                     | 78      | 568                    | 353     |
| CDR = 0     | 3           | 9       | --                     | --      | 4                      | 118     |
| CDR = 0.5   | 3           | 5       | --                     | --      | 16                     | 116     |
| CDR = 1     | 6           | 1       | --                     | --      | 41                     | 44      |
| CDR = 2     | 13          | 0       | --                     | --      | 107                    | 23      |
| CDR = 3     | 61          | 0       | --                     | --      | 167                    | 23      |
| CDR = 4     | 0           | 0       | --                     | --      | 92                     | 23      |
| CDR = 5     | 0           | 0       | --                     | --      | 141                    | 6       |
| Braak = 0   | 0           | 0       | --                     | --      | 0                      | 39      |
| Braak = 1   | 1           | 5       | --                     | --      | 5                      | 80      |
| Braak = 2   | 4           | 7       | --                     | --      | 17                     | 112     |
| Braak = 3   | 2           | 1       | --                     | --      | 30                     | 97      |
| Braak = 4   | 8           | 2       | --                     | --      | 39                     | 8       |
| Braak = 5   | 35          | 0       | --                     | --      | 106                    | 3       |
| Braak = 6   | 26          | 0       | --                     | --      | 338                    | 0       |
| Braak = NA  | 10          | 0       | --                     | --      | 33                     | 14      |

**Table S3. Number of genes removed by filters**

Filters include insufficient expression levels, missing sex, or significant sex-related differences in expression (“Genes Removed”), and genes that were removed due to significant sex-related differences in expression alone (“Sex-Specific Genes”).

| <b>Dataset</b>               | <b>Cell Type</b> | <b>Genes Removed</b> | <b>Sex-Specific Genes</b> |
|------------------------------|------------------|----------------------|---------------------------|
| Knight Parietal              | Neuron           | 7862                 | 96                        |
|                              | Astrocyte        | 1173                 | 1052                      |
|                              | Oligodendrocyte  | 18                   | 8                         |
|                              | Microglia        | 69                   | 23                        |
| Mayo Cerebellum              | Neuron           | 2776                 | 2631                      |
|                              | Astrocyte        | 1381                 | 334                       |
|                              | Oligodendrocyte  | 5946                 | 3765                      |
|                              | Microglia        | 353                  | 133                       |
| Mayo Temporal Cortex         | Neuron           | 166                  | 59                        |
|                              | Astrocyte        | 2233                 | 2004                      |
|                              | Oligodendrocyte  | 210                  | 109                       |
|                              | Microglia        | 901                  | 519                       |
| MSBB Frontal Pole            | Neuron           | 58                   | 42                        |
|                              | Astrocyte        | 158                  | 91                        |
|                              | Oligodendrocyte  | 67                   | 40                        |
|                              | Microglia        | 9930                 | 9526                      |
| MSBB Inferior Frontal Gyrus  | Neuron           | 4141                 | 10                        |
|                              | Astrocyte        | 371                  | 110                       |
|                              | Oligodendrocyte  | 69                   | 24                        |
|                              | Microglia        | 9929                 | 9156                      |
| MSBB Parahippocampal Gyrus   | Neuron           | 319                  | 279                       |
|                              | Astrocyte        | 2101                 | 2760                      |
|                              | Oligodendrocyte  | 433                  | 347                       |
|                              | Microglia        | 506                  | 229                       |
| MSBB Superior Temporal Gyrus | Neuron           | 472                  | 407                       |
|                              | Astrocyte        | 2177                 | 2150                      |
|                              | Oligodendrocyte  | 104                  | 34                        |
|                              | Microglia        | 4027                 | 4004                      |

**Table S4. Number of AD cases and controls with genes that passed filtering criteria for each brain region**

| <b>AD Cases and Controls</b> |     |         |
|------------------------------|-----|---------|
| Brain Region                 | AD  | Control |
| Knigh Parietal               | 62  | 13      |
| Mayo Cerebellum              | 65  | 64      |
| Mayo Temporal Cortex         | 80  | 76      |
| MSBB Frontal Pole            | 108 | 44      |
| MSBB Inferior Frontal Gyrus  | 101 | 38      |
| MSBB Parahippocampal Gyrus   | 100 | 38      |
| MSBB Superior Temporal Gyrus | 110 | 37      |

**Table S5. Bonferroni corrected  $\alpha$ -values by brain region and cell type for glycolytic genes**

| <b>Brain Region</b>          | <b>Neuron</b> | <b>Astrocyte</b> | <b>Oligodendrocyte</b> | <b>Microglia</b> |
|------------------------------|---------------|------------------|------------------------|------------------|
| Knight Parietal              | 0.01          | 0.002778         | 0.002632               | 0.002632         |
| Mayo Cerebellum              | 0.002778      | 0.0025           | 0.005                  | 0.0025           |
| Mayo Temporal Cortex         | 0.0025        | 0.0025           | 0.0025                 | 0.0025           |
| MSBB Frontal Pole            | 0.0025        | 0.0025           | 0.0025                 | 0.003571         |
| MSBB Inferior Frontal Gyrus  | 0.0025        | 0.0025           | 0.0025                 | 0.002632         |
| MSBB Parahippocampal Gyrus   | 0.0025        | 0.0025           | 0.0025                 | 0.0025           |
| MSBB Superior Temporal Gyrus | 0.01667       | 0.002632         | 0.002632               | 0.004545         |

**Table S6. Bonferroni corrected  $\alpha$ -values by brain region and cell type for ketolytic genes**

| <b>Brain Region</b>          | <b>Neuron</b> | <b>Astrocyte</b> | <b>Oligodendrocyte</b> | <b>Microglia</b> |
|------------------------------|---------------|------------------|------------------------|------------------|
| Knight Parietal              | 0.0125        | 0.0125           | 0.008333               | 0.008333         |
| Mayo Cerebellum              | 0.0125        | 0.0025           | 0.01667                | 0.008333         |
| Mayo Temporal Cortex         | 0.01          | 0.0025           | 0.01                   | 0.01             |
| MSBB Frontal Pole            | 0.008333      | 0.01             | 0.008333               | 0.025            |
| MSBB Inferior Frontal Gyrus  | 0.008333      | 0.008333         | 0.008333               | 0.01             |
| MSBB Parahippocampal Gyrus   | 0.008333      | 0.01             | 0.01                   | 0.008333         |
| MSBB Superior Temporal Gyrus | 0.0125        | 0.008333         | 0.008333               | 0.0125           |



**Table S7. Empirical p-values by brain region and cell type.**

| <b>Brain Region</b>          | <b>Neuron</b>           | <b>Astrocyte</b>        | <b>Oligodendrocyte</b> | <b>Microglia</b> |
|------------------------------|-------------------------|-------------------------|------------------------|------------------|
| Knigh Parietal               | 0.001138                | 0.05065                 | 0.02488                | 0.2112           |
| Mayo Cerebellum              | 0.0002759               | $2.618 \times 10^{-14}$ | $2.358 \times 10^{-7}$ | 0.002181         |
| Mayo Temporal Cortex         | $5.622 \times 10^{-5}$  | $8.338 \times 10^{-13}$ | $7.343 \times 10^{-9}$ | 0.003816         |
| MSBB Frontal Pole            | $1.616 \times 10^{-5}$  | 0.02522                 | 0.003687               | 0.02903          |
| MSBB Inferior Frontal Gyrus  | 0.0001757               | 0.02208                 | 0.0003743              | 0.01374          |
| MSBB Parahippocampal Gyrus   | $5.051 \times 10^{-12}$ | $6.677 \times 10^{-5}$  | $4.462 \times 10^{-9}$ | 0.005368         |
| MSBB Superior Temporal Gyrus | $3.975 \times 10^{-5}$  | 0.01814                 | 0.0005621              | 0.06082          |

**Table S8. Glycolytic genes in neurons included from each dataset**

| <b>Dataset</b>               | <b>Genes</b>                                                                                                                        |
|------------------------------|-------------------------------------------------------------------------------------------------------------------------------------|
| Knigh t Parietal             | <i>SLC2A3, GAPDH, HK2, PGAM1, PGK1</i>                                                                                              |
| Mayo Cerebellum              | <i>INSR, IRS1, IRS2, SLC2A1, SLC2A3, SLC2A4, ALDOA, GAPDH, GPI, HK1, HK2, PDHA1, PFKM, PFKP, PGAM1, PGK1, PKM, TPI</i>              |
| Mayo Temporal Cortex         | <i>INSR, IRS1, IRS2, SLC2A1, SLC2A3, SLC2A4, ALDOA, ENO2, GAPDH, GPI, HK1, HK2, PDHA1, PFKL, PFKM, PFKP, PGAM1, PGK1, PKM, TPI1</i> |
| MSBB Frontal Pole            | <i>INSR, IRS1, IRS2, SLC2A1, SLC2A3, SLC2A4, ALDOA, ENO2, GAPDH, GPI, HK1, HK2, PDHA1, PFKL, PFKM, PFKP, PGAM1, PGK1, PKM, TPI1</i> |
| MSBB Inferior Frontal Gyrus  | <i>INSR, IRS1, IRS2, SLC2A1, SLC2A3, SLC2A4, ALDOA, ENO2, GAPDH, GPI, HK1, HK2, PDHA1, PFKL, PFKM, PFKP, PGAM1, PGK1, PKM, TPI1</i> |
| MSBB Parahippocampal Gyrus   | <i>INSR, IRS1, IRS2, SLC2A1, SLC2A3, SLC2A4, ALDOA, ENO2, GAPDH, GPI, HK1, HK2, PDHA1, PFKL, PFKM, PFKP, PGAM1, PGK1, PKM, TPI1</i> |
| MSBB Superior Temporal Gyrus | <i>SLC2A4, HK2, PFKL</i>                                                                                                            |

**Table S9. Glycolytic genes in astrocytes included from each dataset**

| <b>Dataset</b>               | <b>Genes</b>                                                                                                                        |
|------------------------------|-------------------------------------------------------------------------------------------------------------------------------------|
| Knight Parietal              | <i>INSR, IRS1, IRS2, SLC2A1, SLC2A3, ALDOA, ENO2, GAPDH, GPI, HK1, HK2, PDHA1, PFKL, PFKM, PFKP, PGAM1, PGK1, PKM, TPI1</i>         |
| Mayo Cerebellum              | <i>IRS1, SLC2A1, SLC2A4, ALDOA, GAPDH, HK2, PFKP, PGAM1, PKM, TPI1</i>                                                              |
| Mayo Temporal Cortex         | <i>INSR, IRS1, IRS2, SLC2A1, SLC2A3, SLC2A4, ALDOA, ENO2, GAPDH, GPI, HK1, HK2, PDHA1, PFKL, PFKM, PFKP, PGAM1, PGK1, PKM, TPI1</i> |
| MSBB Frontal Pole            | <i>INSR, IRS1, IRS2, SLC2A1, SLC2A3, SLC2A4, ALDOA, ENO2, GAPDH, GPI, HK1, HK2, PDHA1, PFKL, PFKM, PFKP, PGAM1, PGK1, PKM, TPI1</i> |
| MSBB Inferior Frontal Gyrus  | <i>INSR, IRS1, IRS2, SLC2A1, SLC2A3, SLC2A4, ALDOA, ENO2, GAPDH, GPI, HK1, HK2, PDHA1, PFKL, PFKM, PFKP, PGAM1, PGK1, PKM, TPI1</i> |
| MSBB Parahippocampal Gyrus   | <i>INSR, IRS1, IRS2, SLC2A1, SLC2A3, SLC2A4, ALDOA, ENO2, GAPDH, GPI, HK1, HK2, PDHA1, PFKL, PFKM, PFKP, PGAM1, PGK1, PKM, TPI1</i> |
| MSBB Superior Temporal Gyrus | <i>INSR, IRS1, IRS2, SLC2A1, SLC2A3, ALDOA, ENO2, GAPDH, GPI, HK1, HK2, PDHA1, PFKL, PFKM, PFKP, PGAM1, PGK1, PKM, TPI1</i>         |

**Table S10. Glycolytic genes in oligodendrocytes included from each dataset**

| <b>Dataset</b>               | <b>Genes</b>                                                                                                                        |
|------------------------------|-------------------------------------------------------------------------------------------------------------------------------------|
| Knight Parietal              | <i>INSR, IRS1, IRS2, SLC2A1, SLC2A3, ALDOA, ENO2, GAPDH, GPI, HK1, HK2, PDHA1, PFKL, PFKM, PGAM1, PGK1, PKM, TPI1</i>               |
| Mayo Cerebellum              | <i>INSR, IRS1, IRS2, SLC2A1, SLC2A3, SLC2A4, ALDOA, ENO2, GAPDH, GPI, HK1, HK2, PDHA1, PFKL, PFKM, PFKP, PGAM1, PGK1, PKM, TPI1</i> |
| Mayo Temporal Cortex         | <i>INSR, IRS1, IRS2, SLC2A1, SLC2A3, SLC2A4, ALDOA, ENO2, GAPDH, GPI, HK1, HK2, PDHA1, PFKL, PFKM, PFKP, PGAM1, PGK1, PKM, TPI1</i> |
| MSBB Frontal Pole            | <i>INSR, IRS1, IRS2, SLC2A1, SLC2A3, SLC2A4, ALDOA, ENO2, GAPDH, GPI, HK1, HK2, PDHA1, PFKL, PFKM, PFKP, PGAM1, PGK1, PKM, TPI1</i> |
| MSBB Inferior Frontal Gyrus  | <i>INSR, IRS1, IRS2, SLC2A1, SLC2A3, SLC2A4, ALDOA, ENO2, GAPDH, GPI, HK1, HK2, PDHA1, PFKL, PFKM, PFKP, PGAM1, PGK1, PKM, TPI1</i> |
| MSBB Parahippocampal Gyrus   | <i>IRS1, IRS2, SLC2A3, SLC2A4, ALDOA, ENO2, GAPDH, GPI, HK1, PDHA1, PFKL, PFKM, PFKP, PGAM1, PGK1, PKM, TPI1</i>                    |
| MSBB Superior Temporal Gyrus | <i>INSR, IRS1, IRS2, SLC2A1, SLC2A3, ALDOA, ENO2, GAPDH, GPI, HK1, HK2, PDHA1, PFKL, PFKM, PFKP, PGAM1, PGK1, PKM, TPI1</i>         |

**Table S11. Glycolytic genes in microglia included from each dataset**

| <b>Dataset</b>               | <b>Genes</b>                                                                                                                        |
|------------------------------|-------------------------------------------------------------------------------------------------------------------------------------|
| Knight Parietal              | <i>INSR, IRS1, IRS2, SLC2A1, SLC2A3, ALDOA, ENO2, GAPDH, GPI, HK1, HK2, PDHA1, PFKL, PFKM, PFKP, PGAM1, PGK1, PKM, TPI1</i>         |
| Mayo Cerebellum              | <i>INSR, IRS1, IRS2, SLC2A1, SLC2A3, SLC2A4, ALDOA, ENO2, GAPDH, GPI, HK1, HK2, PDHA1, PFKL, PFKM, PFKP, PGAM1, PGK1, PKM, TPI1</i> |
| Mayo Temporal Cortex         | <i>INSR, IRS1, IRS2, SLC2A1, SLC2A3, SLC2A4, ALDOA, ENO2, GAPDH, GPI, HK1, HK2, PDHA1, PFKL, PFKM, PFKP, PGAM1, PGK1, PKM, TPI1</i> |
| MSBB Frontal Pole            | <i>INSR, SLC2A1, SLC2A3, SLC2A4, ALDOA, ENO2, GAPDH, GPI, HK1, HK2, PGAM1, PGK1, PKM, TPI1</i>                                      |
| MSBB Inferior Frontal Gyrus  | <i>INSR, IRS1, IRS2, SLC2A1, SLC2A3, SLC2A4, ALDOA, ENO2, GAPDH, GPI, HK1, PDHA1, PFKL, PFKM, PFKP, PGAM1, PGK1, PKM, TPI1</i>      |
| MSBB Parahippocampal Gyrus   | <i>INSR, IRS1, IRS2, SLC2A1, SLC2A3, SLC2A4, ALDOA, ENO2, GAPDH, GPI, HK1, HK2, PDHA1, PFKL, PFKM, PFKP, PGAM1, PGK1, PKM, TPI1</i> |
| MSBB Superior Temporal Gyrus | <i>INSR, IRS1, SLC2A1, SLC2A3, SLC2A4, ALDOA, ENO2, HK1, PGK1, PKM, TPI1</i>                                                        |

**Table S12. Ketolytic genes in neurons included from each dataset**

| <b>Dataset</b>               | <b>Genes</b>                                         |
|------------------------------|------------------------------------------------------|
| Knight Parietal              | <i>SLC16A1, SLC16A3, ACAT1, OXCT1</i>                |
| Mayo Cerebellum              | <i>SLC16A1, ACAT1, OXCT1</i>                         |
| Mayo Temporal Cortex         | <i>SLC16A3, SLC16A7, ACAT1, BDH1, OXCT1</i>          |
| MSBB Frontal Pole            | <i>SLC16A1, SLC16A3, SLC16A7, ACAT1, BDH1, OXCT1</i> |
| MSBB Inferior Frontal Gyrus  | <i>SLC16A1, SLC16A3, SLC16A7, ACAT1, BDH1, OXCT1</i> |
| MSBB Parahippocampal Gyrus   | <i>SLC16A1, SLC16A3, SLC16A7, ACAT1, BDH1, OXCT1</i> |
| MSBB Superior Temporal Gyrus | <i>SLC16A3, SLC16A7, ACAT1, BDH1, OXCT1</i>          |

**Table S13. Ketolytic genes in astrocytes included from each dataset**

| <b>Dataset</b>               | <b>Genes</b>                                         |
|------------------------------|------------------------------------------------------|
| Knight Parietal              | <i>SLC16A1, SLC16A3, SLC16A7, ACAT1, BDH1, OXCT1</i> |
| Mayo Cerebellum              | <i>SLC16A1, ACAT1, OXCT1</i>                         |
| Mayo Temporal Cortex         | <i>SLC16A3, SLC16A7, ACAT1, BDH1, OXCT1</i>          |
| MSBB Frontal Pole            | <i>SLC16A1, SLC16A3, SLC16A7, ACAT1, BDH1, OXCT1</i> |
| MSBB Inferior Frontal Gyrus  | <i>SLC16A1, SLC16A3, SLC16A7, ACAT1, BDH1, OXCT1</i> |
| MSBB Parahippocampal Gyrus   | <i>SLC16A3, SLC16A7, ACAT1, BDH1, OXCT1</i>          |
| MSBB Superior Temporal Gyrus | <i>SLC16A1, SLC16A3, SLC16A7, ACAT1, BDH1, OXCT1</i> |

**Table S14. Ketolytic genes in oligodendrocytes included from each dataset**

| <b>Dataset</b>               | <b>Genes</b>                                         |
|------------------------------|------------------------------------------------------|
| Knight Parietal              | <i>SLC16A1, SLC16A3, ACAT1, OXCT1</i>                |
| Mayo Cerebellum              | <i>SLC16A1, ACAT1, OXCT1</i>                         |
| Mayo Temporal Cortex         | <i>SLC16A3, SLC16A7, ACAT1, BDH1, OXCT1</i>          |
| MSBB Frontal Pole            | <i>SLC16A1, SLC16A3, SLC16A7, ACAT1, BDH1, OXCT1</i> |
| MSBB Inferior Frontal Gyrus  | <i>SLC16A1, SLC16A3, SLC16A7, ACAT1, BDH1, OXCT1</i> |
| MSBB Parahippocampal Gyrus   | <i>SLC16A1, SLC16A3, SLC16A7, ACAT1, BDH1, OXCT1</i> |
| MSBB Superior Temporal Gyrus | <i>SLC16A3, SLC16A7, ACAT1, BDH1, OXCT1</i>          |



**Table S15. Ketolytic genes in microglia included from each dataset**

| <b>Dataset</b>               | <b>Genes</b>                                         |
|------------------------------|------------------------------------------------------|
| Knight Parietal              | <i>SLC16A1, SLC16A3, SLC16A7, ACAT1, BDH1, OXCT1</i> |
| Mayo Cerebellum              | <i>SLC16A1, SLC16A3, ACAT1, BDH1, OXCT1</i>          |
| Mayo Temporal Cortex         | <i>SLC16A3, SLC16A7, ACAT1, BDH1, OXCT1</i>          |
| MSBB Frontal Pole            | <i>SLC16A3, OXCT1</i>                                |
| MSBB Inferior Frontal Gyrus  | <i>SLC16A3, SLC16A7, ACAT1, BDH1, OXCT1</i>          |
| MSBB Parahippocampal Gyrus   | <i>SLC16A1, SLC16A3, SLC16A7, ACAT1, BDH1, OXCT1</i> |
| MSBB Superior Temporal Gyrus | <i>SLC16A1, SLC16A3, SLC16A7, OXCT1</i>              |

# Figures

## Figure S1: Glycolysis in Astrocytes

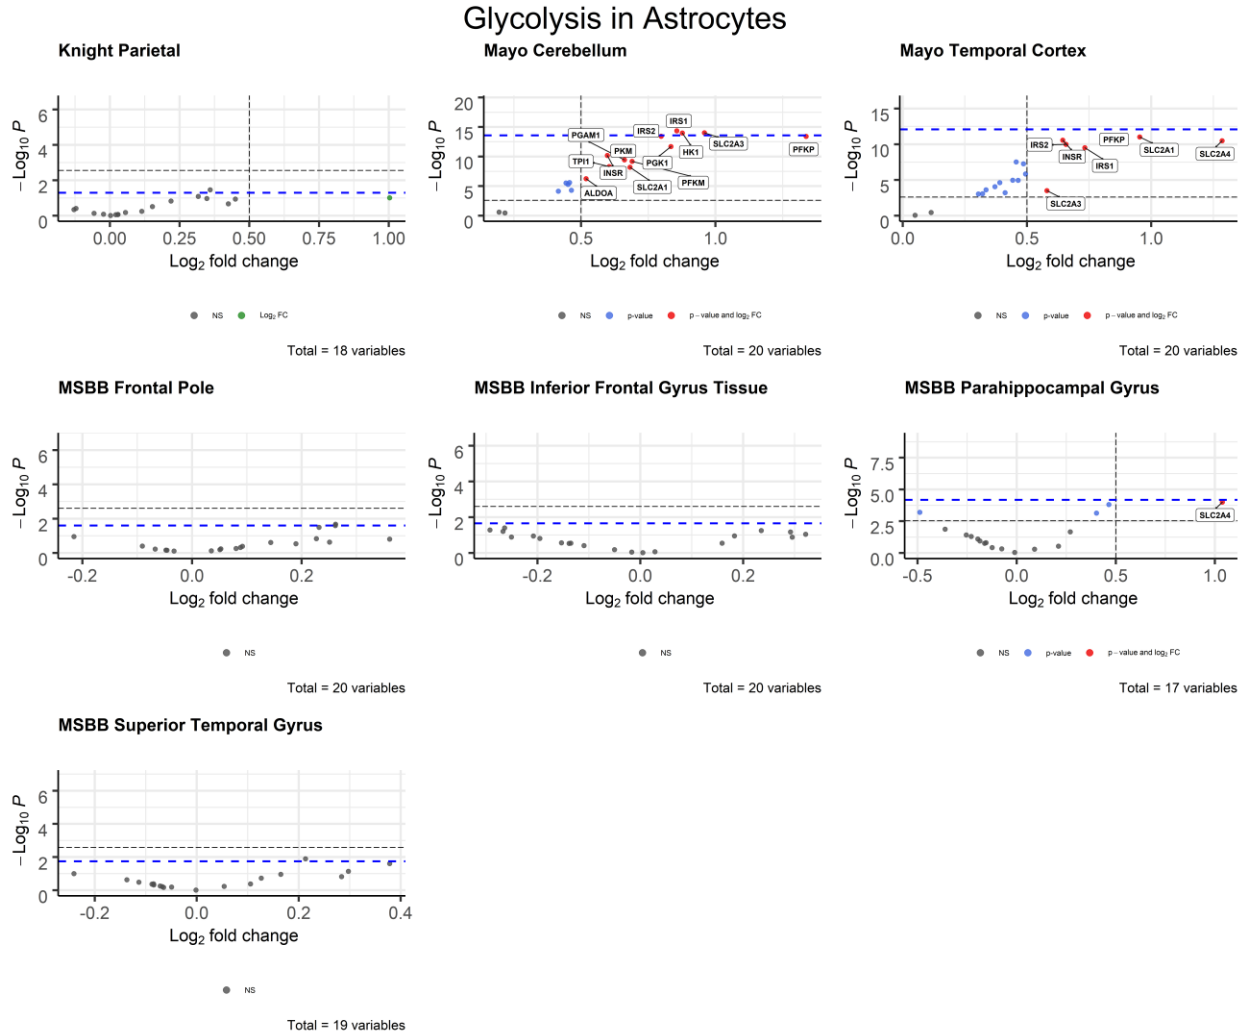

**Figure S2: Glycolysis in Microglia**

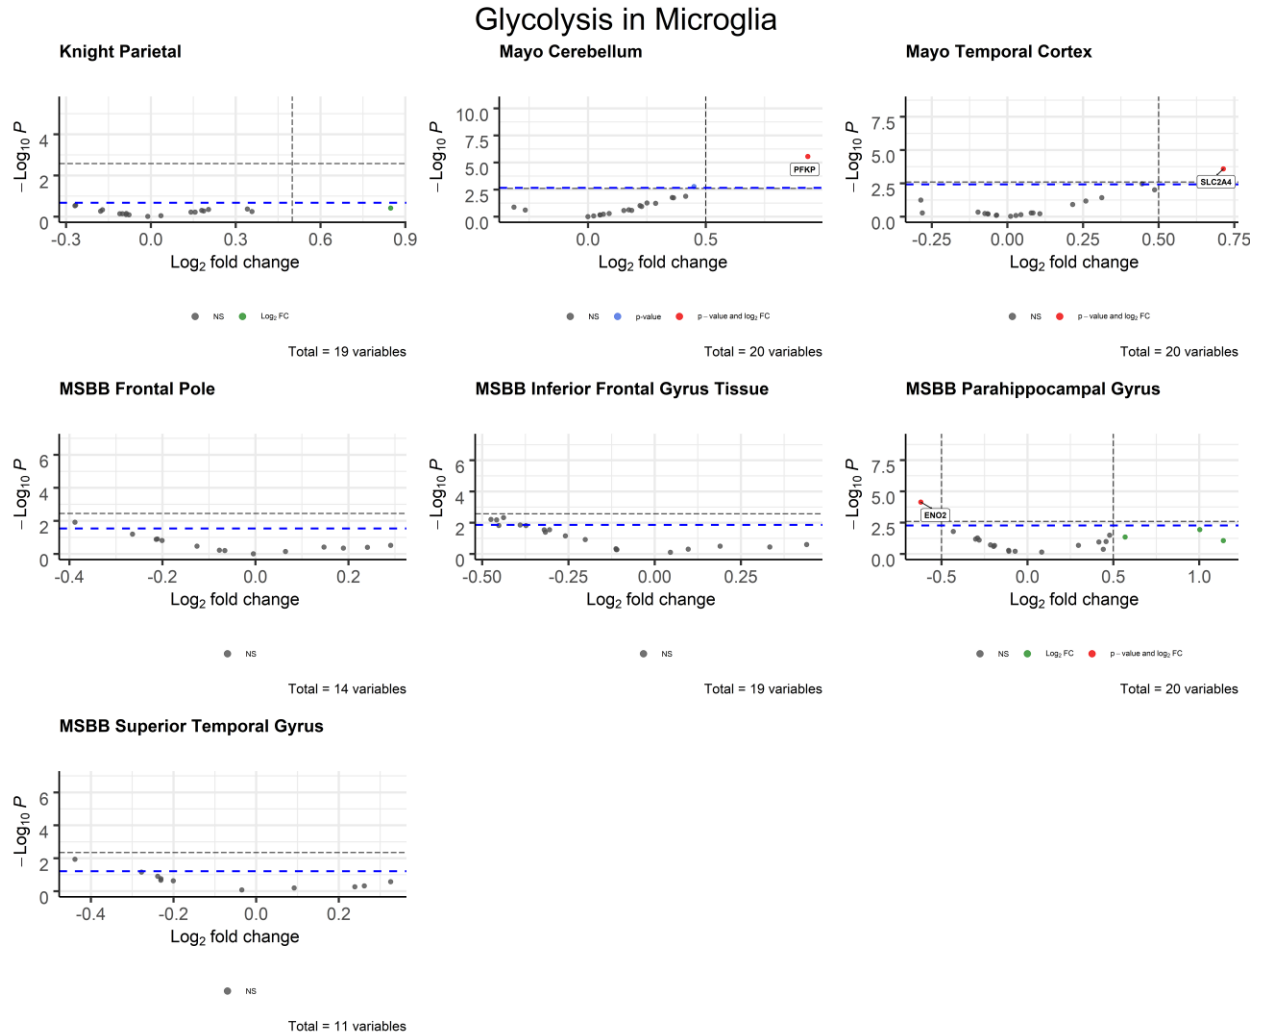

**Figure S3: Ketolysis in Astrocytes**

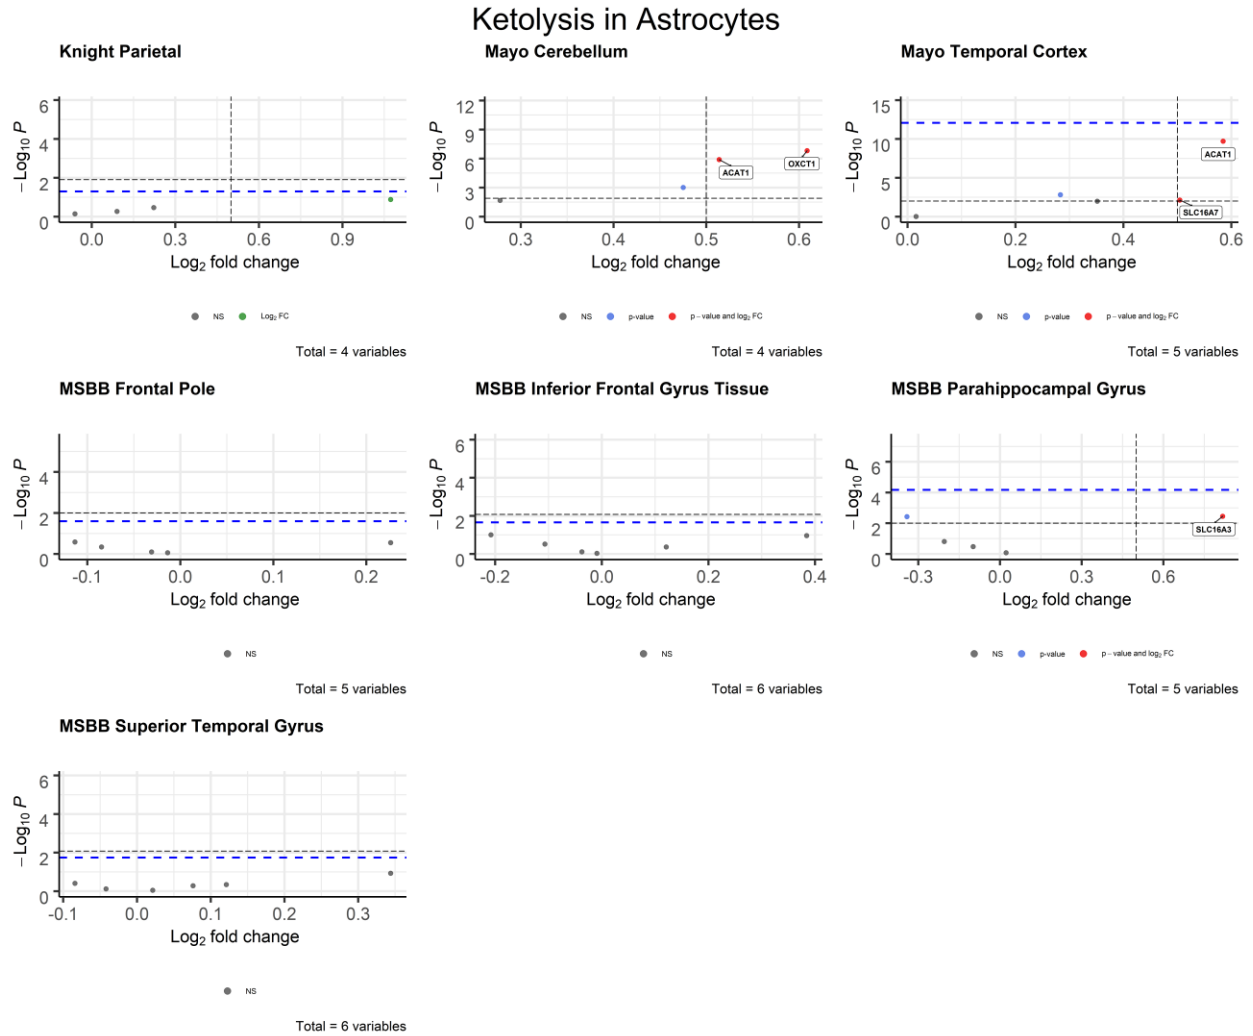

**Figure S4: Ketolysis in Microglia**

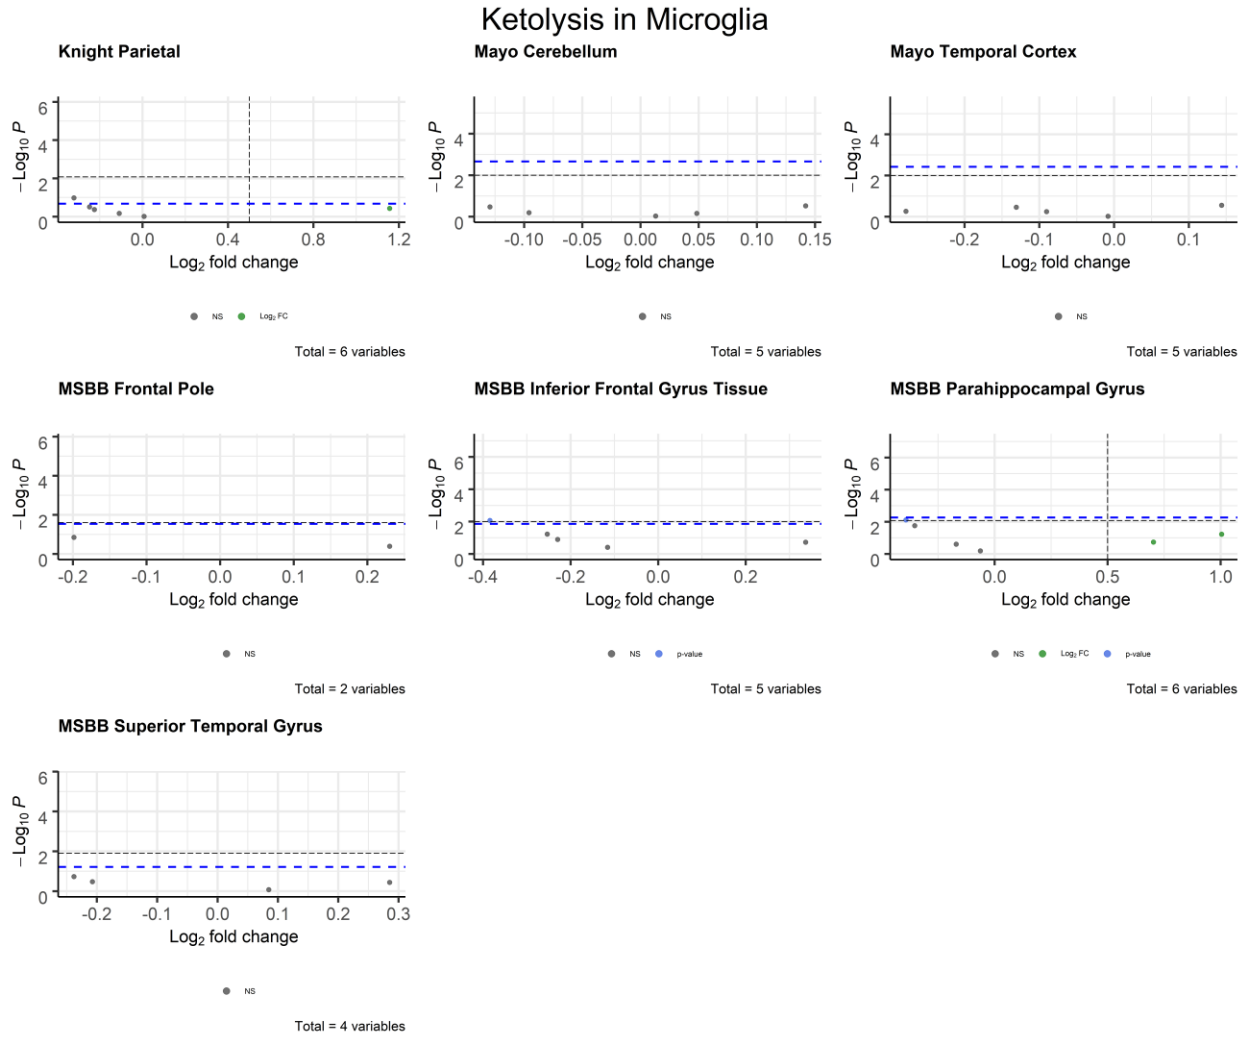

Supplement: ALZ-17-1474-s001.pdf [file ALZ-17-1474-s001.pdf]
